# Supplementary material for: Loop-Mediated Isothermal Amplification for Rickettsia typhi (the Causal Agent of Murine Typhus): Problems with Diagnosis at the Limit of Detection
Source: PubMed Central journal article supplement (PMC3957756; doi:10.1128/jcm.02786-13), 2014-03
Supplement: JCM.02786-13_zjm999093197so1.pdf [file JCM.02786-13_zjm999093197so1.pdf]

Table S1: Organisms and relevant strain information of bacterial isolates used during the developmental phase of the study.

| <b>Organism</b>                                  | <b>Strain</b>    | <b>Organism reference</b>       |
|--------------------------------------------------|------------------|---------------------------------|
| <i>Burkholderia pseudomallei</i>                 | n.a.             | Culture isolate <sup>A, B</sup> |
| <i>Ehrlichia chaffeensis</i>                     | n.a.             | Culture isolate <sup>A</sup>    |
| <i>Escherichia coli</i>                          | n.a.             | ESBL33590 <sup>B</sup>          |
| <i>Klebsiella pneumoniae</i>                     | CDC 298/53       | NCTC 9633                       |
| <i>Leptospira interrogans</i>                    | n.a.             | Culture isolate <sup>A</sup>    |
| <i>Neorickettsia sennetsu</i>                    | Miyayama         | ATCC VR-367                     |
| <i>Orientia tsutsugamushi</i>                    | Karp             | Culture isolate <sup>A</sup>    |
| <i>Orientia tsutsugamushi</i> (n=12)             | n.a.             | Lao human isolates <sup>A</sup> |
| <i>Plasmodium falciparum</i>                     | 3D7              | Culture isolate <sup>A</sup>    |
| <i>Plasmodium vivax</i>                          | n.a.             | Lao human isolate <sup>A</sup>  |
| <i>Pseudomonas aeruginosa</i>                    | Boston 41501     | ATCC 27853                      |
| <i>Rickettsia conorii</i>                        | Malish           | ATCC VR-613                     |
| <i>Rickettsia felis</i>                          | B377 (Australia) | Flea isolate <sup>A</sup>       |
| <i>Rickettsia honei</i>                          | RB               | Human isolate <sup>A</sup>      |
| <i>Rickettsia prowazekii</i>                     | Breinl           | ATCC VR-142                     |
| <i>Salomonella enterica</i> serotype Enteritidis | CDC K-1891       | ATCC 13076                      |
| <i>Salmonella enterica</i> serotype Typhi        | Ty 2             | NCTC 8385                       |
| <i>Staphylococcus aureus</i>                     | F-182            | ATCC 43300                      |

<sup>A</sup>Clinical isolate; identity was confirmed in our or collaborating laboratories using published PCR assays (1-6).

<sup>B</sup>Clinical isolate; identity was confirmed by API NE (bioMérieux; France) and colony morphology.

## Supplementary material: References

1. **Henry KM, Jiang J, Rozmajzl PJ, Azad AF, Macaluso KR, Richards AL.** 2007. Development of quantitative real-time PCR assays to detect *Rickettsia typhi* and *Rickettsia felis*, the causative agents of murine typhus and flea-borne spotted fever. *Mol Cell Probes* **21**:17-23.
2. **Jiang J, Chan TC, Temenak JJ, Dasch GA, Ching WM, Richards AL.** 2004. Development of a quantitative real-time polymerase chain reaction assay specific for *Orientia tsutsugamushi*. *Am J Trop Med Hyg* **70**:351-356.
3. **Novak RT, Glass MB, Gee JE, Gal D, Mayo MJ, Currie BJ, Wilkins PP.** 2006. Development and evaluation of a real-time PCR assay targeting the type III secretion system of *Burkholderia pseudomallei*. *J Clin Microbiol* **44**:85-90.
4. **Parola P, Roux V, Camicas JL, Baradji I, Brouqui P, Raoult D.** 2000. Detection of ehrlichiae in African ticks by polymerase chain reaction. *Trans R Soc Trop Med Hyg* **94**:707-708.
5. **Snounou G, Singh B.** 2002. Nested PCR analysis of Plasmodium parasites. *Methods Mol Med* **72**:189-203.
6. **Thaipadungpanit J, Chierakul W, Wuthiekanun V, Limmathurotsakul D, Amornchai P, Boonslip S, Smythe LD, Limpai boon R, Hoffmaster AR, Day NP, Peacock SJ.** 2011. Diagnostic accuracy of real-time PCR assays targeting 16S rRNA and *lipL32* genes for human leptospirosis in Thailand: a case-control study. *PLoS One* **6**:e16236.
